# Supplementary material
Source: PubMed Central journal article supplement (PMC1459387)

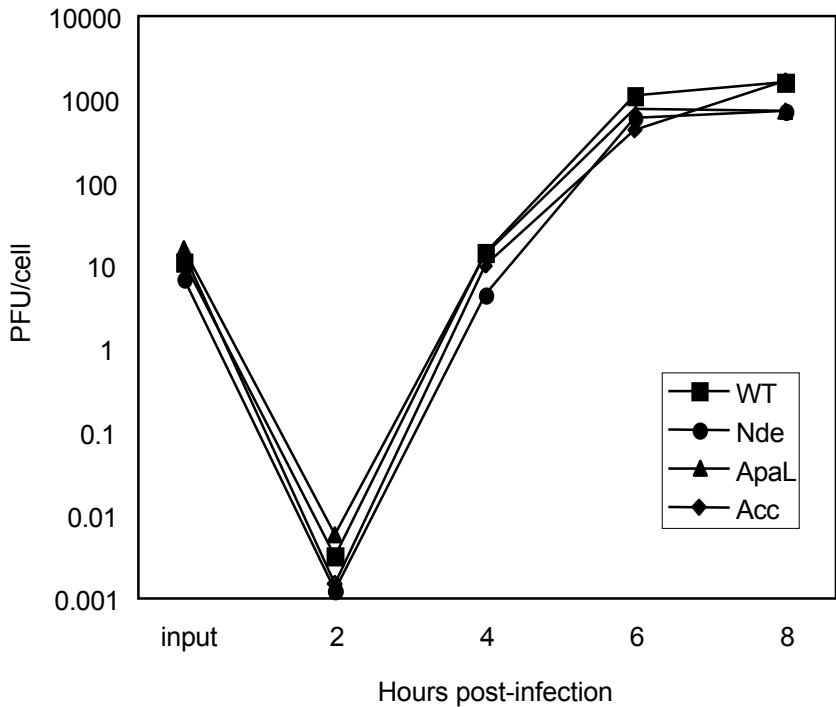

Supplement: pnas_0600834103_1.pdf [file pnas_0600834103_1.pdf]

IM- muscle

IC- brain

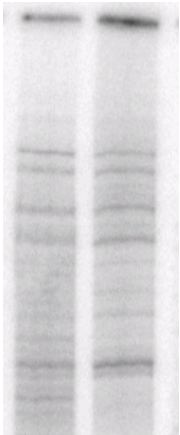

WT  
NdeI  
ApaLI  
Accl

Supplement: pnas_0600834103_2.pdf [file pnas_0600834103_2.pdf]
